# Supplementary material for: Construction and forensic application of 20 highly polymorphic microhaplotypes
Source: R Soc Open Sci. 2020 May 13;7(5):191937. doi: 10.1098/rsos.191937 (PMC7277291; doi:10.1098/rsos.191937)
Supplement: Supplementary Table 4 [file RSOS191937supp8.xlsx]

## Sheet: Sheet1
Supplementary Table 4. The observed alleles and allele frequencies of 20 microhaplotypes for 2554 individuals （2504 from 1000 genome project and 50 unrelated individuals from our study）.
mh02zha012	ACB	ASW	ESN	GWD	LWK	MSL	YRI		CDX	CHB	CHS	JPT	KHV	50 unrelated Han Chinese		BEB	GIH	ITU	PJL	STU		CEU	FIN	GBR	IBS	TSI		CLM	MXL	PEL	PUR
CCA	0.510417	0.42623	0.535354	0.362832	0.414141	0.547059	0.486111		0.0376344	0.0728155	0.0666667	0.0769231	0.030303	0.07		0.145349	0.116505	0.0882353	0.125	0.0637255		0.131313	0.0858586	0.159341	0.135514	0.163551		0.159574	0.171875	0.129412	0.139423
CCG	0	0	0	0.00442478	0	0	0		0.00537634	0	0	0	0	0		0	0	0	0	0		0	0	0	0	0		0	0	0	0
CTA	0.223958	0.213115	0.176768	0.234513	0.212121	0.105882	0.148148		0.370968	0.451456	0.314286	0.355769	0.429293	0.46		0.447674	0.514563	0.480392	0.479167	0.588235		0.424242	0.39899	0.401099	0.476636	0.415888		0.297872	0.382812	0.335294	0.394231
GCA	0	0	0	0	0	0	0		0	0	0	0.00480769	0	0		0	0	0	0	0		0	0	0	0	0		0	0	0	0
GCG	0.140625	0.237705	0.141414	0.300885	0.20202	0.205882	0.185185		0.344086	0.334951	0.4	0.413462	0.378788	0.28		0.313953	0.305825	0.357843	0.359375	0.279412		0.439394	0.5	0.43956	0.373832	0.392523		0.446809	0.304688	0.264706	0.322115
GTG	0	0	0	0	0	0	0		0	0	0	0	0	0		0	0	0	0	0.00490196		0	0	0	0	0		0	0	0	0
TCA	0.125	0.122951	0.141414	0.0973451	0.171717	0.141176	0.180556		0.241935	0.140777	0.219048	0.149038	0.161616	0.19		0.0930233	0.0631068	0.0735294	0.0364583	0.0637255		0.00505051	0.0151515	0	0.0140187	0.0280374		0.0957447	0.140625	0.270588	0.144231
TCG	0	0	0.00505051	0	0	0	0		0	0	0	0	0	0		0	0	0	0	0		0	0	0	0	0		0	0	0	0
mh03zha001	ACB	ASW	ESN	GWD	LWK	MSL	YRI		CDX	CHB	CHS	JPT	KHV	50 unrelated Han Chinese		BEB	GIH	ITU	PJL	STU		CEU	FIN	GBR	IBS	TSI		CLM	MXL	PEL	PUR
CGCT	0.03125	0.0327869	0.166667	0	0.0252525	0	0		0.38172	0.315534	0.347619	0.350962	0.383838	0.45		0.156977	0.213592	0.186275	0.166667	0.191176		0.277778	0.308081	0.274725	0.224299	0.247664		0.255319	0.351562	0.288235	0.134615
TCTG	0.208333	0.180328	0.010101	0.216814	0.272727	0.194118	0.24537		0.0376344	0.0242718	0.0428571	0.0240385	0.0505051	0.04		0.0465116	0.0485437	0.0735294	0.0729167	0.0490196		0.247475	0.151515	0.208791	0.158879	0.140187		0.223404	0.203125	0.2	0.221154
TCTT	0.0104167	0.0163934	0	0.00884956	0.0454545	0.0352941	0.0138889		0	0	0	0	0	0		0	0	0	0	0		0	0	0	0	0		0	0	0	0
TGCT	0.552083	0.409836	0.60101	0.588496	0.525253	0.558824	0.523148		0.306452	0.334951	0.3	0.336538	0.257576	0.22		0.255814	0.18932	0.156863	0.276042	0.220588		0.146465	0.257576	0.175824	0.280374	0.214953		0.191489	0.164062	0.241176	0.259615
TGTG	0	0	0	0	0	0	0		0	0	0	0	0	0.01		0	0	0	0.00520833	0		0	0	0.00549451	0	0		0	0	0	0
TGTT	0.0833333	0.139344	0.0505051	0.0973451	0.0606061	0.0647059	0.101852		0.236559	0.23301	0.2	0.177885	0.252525	0.23		0.331395	0.26699	0.284314	0.296875	0.254902		0.252525	0.181818	0.203297	0.200935	0.21028		0.12234	0.078125	0.0235294	0.177885
TTCG	0	0	0	0	0	0	0		0	0	0	0	0	0		0	0	0.00490196	0	0		0	0	0	0	0		0	0	0	0
TTTG	0.114583	0.221311	0.171717	0.0884956	0.0707071	0.147059	0.115741		0.0376344	0.092233	0.109524	0.110577	0.0555556	0.05		0.209302	0.281553	0.294118	0.182292	0.284314		0.0757576	0.10101	0.131868	0.135514	0.186916		0.207447	0.203125	0.247059	0.206731
mh04zha001	ACB	ASW	ESN	GWD	LWK	MSL	YRI		CDX	CHB	CHS	JPT	KHV	50 unrelated Han Chinese		BEB	GIH	ITU	PJL	STU		CEU	FIN	GBR	IBS	TSI		CLM	MXL	PEL	PUR
CCAA	0	0	0	0	0	0	0		0	0	0	0	0	0.02		0	0	0	0	0		0	0	0	0	0		0	0	0	0
CCGA	0.00520833	0.057377	0	0	0	0	0		0	0	0	0	0	0		0	0.00485437	0	0	0		0	0	0	0	0		0.00531915	0	0	0.00480769
CCGG	0	0	0	0	0	0	0		0	0	0.0047619	0	0	0		0.0116279	0	0.00490196	0.00520833	0		0	0	0.010989	0	0.0046729		0	0.0234375	0.0117647	0
CGAA	0.0416667	0	0.020202	0.0176991	0.010101	0.0176471	0.0277778		0.112903	0.135922	0.166667	0.144231	0.141414	0.06		0.180233	0.106796	0.166667	0.177083	0.171569		0.0454545	0.010101	0.0274725	0.0327103	0.0327103		0.106383	0.125	0.235294	0.0288462
CGAG	0	0	0	0	0	0	0		0	0	0	0.0336538	0	0		0.0174419	0	0	0	0.00490196		0	0	0	0	0		0	0.0078125	0	0.0288462
CGGG	0	0	0	0	0	0	0		0	0	0	0	0	0.01		0	0	0	0	0.00490196		0	0	0	0	0		0	0	0	0
GCAA	0.00520833	0	0	0	0	0	0		0	0	0	0	0	0		0	0	0	0	0		0	0	0	0	0		0	0	0	0
GCGA	0.338542	0.344262	0.262626	0.411504	0.242424	0.294118	0.231481		0.516129	0.456311	0.480952	0.394231	0.530303	0.51		0.511628	0.504854	0.480392	0.567708	0.485294		0.717172	0.813131	0.763736	0.785047	0.817757		0.542553	0.523438	0.294118	0.677885
GCGG	0.0572917	0.0491803	0.040404	0.0132743	0.0252525	0.0117647	0.0740741		0.0107527	0.0145631	0.0142857	0.00480769	0.030303	0		0	0.0194175	0.0539216	0.0208333	0.0392157		0.0757576	0.0454545	0.0549451	0.0373832	0.0186916		0.0531915	0.046875	0.105882	0.0432692
GGAA	0	0	0.010101	0	0	0.00588235	0.00462963		0	0.00485437	0.0047619	0.00961538	0.00505051	0.01		0	0.00485437	0.00490196	0.0104167	0.00490196		0	0	0	0.00934579	0.0046729		0.00531915	0.0078125	0.00588235	0.00480769
GGAG	0	0	0	0.00442478	0	0	0.00925926		0	0	0	0	0	0		0	0	0.00490196	0	0		0	0	0	0	0		0	0	0	0
GGGA	0.015625	0.00819672	0	0.0132743	0.010101	0.00588235	0.0138889		0	0	0	0	0	0		0	0	0	0	0		0	0	0	0.0046729	0		0	0	0	0
GGGG	0.317708	0.360656	0.424242	0.362832	0.434343	0.411765	0.402778		0.258065	0.286408	0.22381	0.216346	0.19697	0.28		0.180233	0.169903	0.176471	0.125	0.166667		0.010101	0.0353535	0.0164835	0.0233645	0.0046729		0.0531915	0.09375	0.0235294	0.0865385
TCGA	0	0	0	0	0	0	0		0	0	0	0	0	0		0	0	0	0	0		0	0	0	0	0.0046729		0	0	0	0
TCGG	0	0.131148	0	0	0	0	0		0	0	0	0	0	0		0.00581395	0.0242718	0.00490196	0	0		0.010101	0	0	0	0.088785		0	0	0.0176471	0
TGAA	0.213542	0.0491803	0.227273	0.132743	0.227273	0.223529	0.194444		0.102151	0.0776699	0.1	0.182692	0.0707071	0.11		0.0872093	0.145631	0.102941	0.09375	0.122549		0.141414	0.0959596	0.126374	0.107477	0.0233645		0.170213	0.109375	0.3	0.105769
TGAG	0	0	0.0151515	0.0442478	0.040404	0.0235294	0.037037		0	0.0242718	0.0047619	0.0144231	0.0252525	0		0	0.0194175	0	0	0		0	0	0	0	0		0.0638298	0.0625	0.00588235	0.0192308
TGGG	0.00520833	0	0	0	0.010101	0.00588235	0.00462963		0	0	0	0	0	0		0.00581395	0	0	0	0		0	0	0	0	0		0	0	0	0
mh04zha002	ACB	ASW	ESN	GWD	LWK	MSL	YRI		CDX	CHB	CHS	JPT	KHV	50 unrelated Han Chinese		BEB	GIH	ITU	PJL	STU		CEU	FIN	GBR	IBS	TSI		CLM	MXL	PEL	PUR
CACC	0	0	0	0	0	0	0		0	0	0	0	0	0.04		0	0	0	0	0		0	0	0	0	0		0	0	0	0
CATC	0	0	0	0	0	0	0		0	0	0	0	0	0.1		0	0	0.00490196	0	0		0	0	0	0	0.00934579		0	0	0	0
CTAC	0	0	0	0	0	0	0		0	0.00485437	0	0.00961538	0	0		0	0	0	0	0		0	0	0	0	0		0	0	0	0
CTCC	0.182292	0.245902	0.287879	0.252212	0.242424	0.170588	0.263889		0.258065	0.271845	0.209524	0.235577	0.262626	0.22		0.0930233	0.135922	0.151961	0.0885417	0.166667		0.156566	0.171717	0.137363	0.0747664	0.126168		0.117021	0.234375	0.164706	0.105769
CTTA	0	0	0.00505051	0	0	0	0		0	0	0	0	0	0		0	0	0	0	0		0	0	0	0	0		0	0	0	0
CTTC	0.546875	0.54918	0.510101	0.513274	0.580808	0.605882	0.569444		0.349462	0.339806	0.4	0.475962	0.469697	0.3		0.622093	0.543689	0.583333	0.651042	0.509804		0.727273	0.69697	0.692308	0.803738	0.64486		0.547872	0.382812	0.229412	0.629808
TAAA	0.00520833	0.0163934	0	0	0	0	0		0.11828	0.150485	0.161905	0.115385	0.131313	0.03		0.0232558	0.00970874	0.0196078	0.0208333	0.0245098		0.00505051	0.00505051	0	0.0046729	0		0.111702	0.171875	0.270588	0.0528846
TAAC	0	0	0	0	0	0	0		0.00537634	0.00970874	0	0	0.00505051	0		0	0	0	0	0		0	0	0	0	0		0.0106383	0.0234375	0.00588235	0
TACA	0	0	0	0	0	0	0		0	0	0.0285714	0.0288462	0.0151515	0		0.00581395	0	0	0	0.00490196		0	0	0	0	0		0.0106383	0	0.0352941	0
TATA	0	0	0	0	0	0	0		0.0322581	0.0339806	0	0	0	0.01		0	0	0	0	0		0	0	0	0	0		0	0.015625	0	0
TATC	0	0.00819672	0	0	0	0	0		0.00537634	0.00485437	0	0.0192308	0.00505051	0.04		0	0	0	0	0		0	0	0	0	0		0	0.0078125	0.00588235	0.0384615
TTAA	0.197917	0.114754	0.166667	0.163717	0.121212	0.158824	0.125		0.0913978	0.0728155	0.0761905	0.0721154	0.0555556	0.25		0.168605	0.23301	0.132353	0.151042	0.215686		0.0959596	0.0959596	0.142857	0.088785	0.168224		0.12766	0.0546875	0.0764706	0.134615
TTAC	0.00520833	0.0163934	0	0.00442478	0.0151515	0.00588235	0.00462963		0.0107527	0	0.00952381	0	0	0.01		0.0174419	0.00485437	0.00980392	0.015625	0.00980392		0.00505051	0.010101	0.010989	0.0046729	0		0.0106383	0	0	0.00961538
TTCA	0.0260417	0	0.0151515	0.0309735	0.0151515	0	0.0185185		0	0	0	0.00480769	0.0151515	0		0.00581395	0	0	0	0		0	0	0	0	0		0.0106383	0	0	0
TTCC	0	0	0	0	0	0	0		0.0107527	0	0	0	0	0		0	0	0	0	0		0	0	0	0	0		0	0	0	0
TTTA	0.0104167	0.0245902	0	0.00442478	0	0.0235294	0.00462963		0.0430108	0.0291262	0.047619	0	0	0		0	0.0242718	0.0392157	0.015625	0.0147059		0	0.0151515	0	0.00934579	0.0140187		0	0.015625	0.0117647	0.0144231
TTTC	0.0260417	0.0245902	0.0151515	0.0309735	0.0252525	0.0352941	0.0138889		0.0752688	0.0825243	0.0666667	0.0384615	0.040404	0		0.0639535	0.0485437	0.0588235	0.0572917	0.0539216		0.010101	0.00505051	0.0164835	0.0140187	0.0373832		0.0531915	0.09375	0.2	0.0144231
mh04zha004	ACB	ASW	ESN	GWD	LWK	MSL	YRI		CDX	CHB	CHS	JPT	KHV	50 unrelated Han Chinese		BEB	GIH	ITU	PJL	STU		CEU	FIN	GBR	IBS	TSI		CLM	MXL	PEL	PUR
GCAC	0.0520833	0.0163934	0.010101	0.0132743	0.0151515	0.0176471	0.0185185		0.016129	0	0	0	0	0		0	0	0.00490196	0	0		0	0.146465	0	0	0.0140187		0	0	0	0
GCAG	0.0729167	0.0409836	0.0909091	0.079646	0.0454545	0.117647	0.0740741		0.0430108	0.0436893	0.0714286	0.0336538	0.0707071	0.02		0.0581395	0.0436893	0.0343137	0.0885417	0.0539216		0.131313	0.030303	0.126374	0.102804	0.0981308		0.0904255	0.015625	0.0117647	0.0865385
GCCG	0.00520833	0	0	0	0.030303	0	0.0185185		0	0	0	0.00480769	0	0		0	0	0	0	0		0	0	0	0	0.0046729		0.0106383	0	0.00588235	0
GGAC	0	0.00819672	0	0	0	0	0		0	0.00485437	0	0	0	0		0.0174419	0.0194175	0.0147059	0.00520833	0.0147059		0	0	0.0164835	0	0.0140187		0.0159574	0	0	0
GGAG	0.0260417	0.0737705	0.0252525	0.00884956	0.0151515	0	0.00925926		0.27957	0.160194	0.142857	0.129808	0.222222	0.19		0.127907	0.0485437	0.107843	0.0625	0.0833333		0.0252525	0	0.0164835	0.0373832	0.0280374		0.0478723	0.046875	0.0176471	0.0384615
GGCG	0	0	0	0	0	0	0		0.0752688	0.0631068	0.0714286	0.0480769	0.040404	0.09		0.0290698	0.0145631	0.0294118	0.0104167	0.00980392		0.0151515	0.0353535	0.00549451	0.0140187	0.00934579		0.00531915	0	0.00588235	0.00961538
GTAC	0.0260417	0	0.020202	0.0221239	0.0454545	0.0176471	0.0277778		0	0	0	0	0	0		0	0	0	0	0		0	0	0	0	0		0.00531915	0	0	0
GTAG	0.0104167	0.0163934	0	0	0.00505051	0	0		0.00537634	0	0	0	0	0		0	0	0	0	0		0	0	0	0	0		0	0	0	0
GTCG	0	0	0	0	0	0	0		0.0107527	0	0.00952381	0	0.0353535	0.02		0.0174419	0	0	0.00520833	0.00490196		0	0	0	0	0		0	0	0	0.0144231
TCAC	0.302083	0.319672	0.308081	0.389381	0.237374	0.388235	0.333333		0.112903	0.174757	0.12381	0.0721154	0.0707071	0.1		0.104651	0.0776699	0.102941	0.104167	0.0735294		0.131313	0.136364	0.137363	0.121495	0.102804		0.0851064	0.0625	0.0176471	0.0913462
TCAG	0.015625	0.00819672	0.020202	0.00442478	0.0353535	0.0176471	0.0138889		0.00537634	0.0145631	0.0047619	0.00480769	0.00505051	0.02		0.0232558	0	0	0	0		0	0	0	0	0		0.00531915	0	0.0176471	0
TCCC	0.0104167	0	0.0353535	0.00884956	0.0606061	0	0.00462963		0	0	0	0	0	0.01		0	0	0	0	0		0	0	0	0	0		0	0	0	0.00480769
TCCG	0	0	0	0	0	0	0		0.00537634	0.00970874	0.00952381	0.00961538	0	0.02		0	0	0.0196078	0.03125	0.0196078		0	0.00505051	0	0	0.0140187		0	0	0	0
TGAC	0.208333	0.180328	0.207071	0.181416	0.20202	0.205882	0.185185		0.00537634	0	0.0047619	0	0.010101	0		0.122093	0.135922	0.132353	0.182292	0.166667		0.207071	0.156566	0.181319	0.186916	0.154206		0.154255	0.21875	0.217647	0.192308
TGAG	0.119792	0.0901639	0.106061	0.150442	0.111111	0.117647	0.111111		0.0322581	0.0339806	0.047619	0.110577	0.0606061	0.04		0.00581395	0.00970874	0.00980392	0.0104167	0		0.00505051	0.040404	0.010989	0.00934579	0.0140187		0.0265957	0.0078125	0.00588235	0.0336538
TGCC	0.015625	0.0245902	0	0.00884956	0.00505051	0	0.0231481		0	0	0	0	0	0		0	0	0	0	0		0.00505051	0	0	0	0		0	0	0	0
TGCG	0.0104167	0.00819672	0	0	0.030303	0.0176471	0.0231481		0	0	0.0142857	0.00961538	0.030303	0.02		0	0	0.00490196	0	0.00490196		0.0151515	0.010101	0	0	0		0	0	0.0117647	0.00480769
TTAC	0.00520833	0.00819672	0.00505051	0	0	0	0.00462963		0.016129	0	0.0047619	0	0	0		0.0116279	0.0679612	0.0490196	0.0260417	0.0294118		0.040404	0.106061	0.0494505	0.0420561	0.0420561		0.0425532	0.046875	0.0470588	0.0336538
TTAG	0	0	0	0	0.00505051	0	0		0.0107527	0.0145631	0.0047619	0.0144231	0	0.01		0.0232558	0.038835	0.00490196	0.015625	0.0196078		0.00505051	0	0.0164835	0.0046729	0.00934579		0.00531915	0	0	0.00961538
TTCC	0	0	0	0	0	0	0		0	0	0	0	0	0		0	0	0	0	0		0	0	0.00549451	0	0.0046729		0.00531915	0.0078125	0.00588235	0
TTCG	0.119792	0.204918	0.171717	0.132743	0.156566	0.1	0.152778		0.38172	0.480583	0.490476	0.5625	0.454545	0.46		0.459302	0.543689	0.485294	0.458333	0.519608		0.419192	0.333333	0.434066	0.481308	0.490654		0.5	0.59375	0.635294	0.480769
mh04zha007	ACB	ASW	ESN	GWD	LWK	MSL	YRI		CDX	CHB	CHS	JPT	KHV	50 unrelated Han Chinese		BEB	GIH	ITU	PJL	STU		CEU	FIN	GBR	IBS	TSI		CLM	MXL	PEL	PUR
AAC	0.796875	0.680328	0.823232	0.769912	0.762626	0.829412	0.842593		0.150538	0.228155	0.238095	0.201923	0.141414	0.18		0.238372	0.330097	0.313725	0.317708	0.397059		0.30303	0.388889	0.313187	0.341121	0.331776		0.319149	0.546875	0.452941	0.427885
AAT	0	0	0.010101	0	0.00505051	0	0		0.462366	0.407767	0.414286	0.403846	0.454545	0.41		0.27907	0.184466	0.27451	0.223958	0.27451		0.00505051	0.0454545	0.00549451	0.0140187	0.0046729		0.0638298	0.046875	0.1	0.0288462
CAC	0.0677083	0.0901639	0	0.00884956	0.0151515	0	0		0.204301	0.165049	0.157143	0.168269	0.222222	0.24		0.244186	0.325243	0.181373	0.302083	0.176471		0.5	0.383838	0.450549	0.443925	0.485981		0.388298	0.257812	0.135294	0.346154
CAT	0	0	0	0	0	0	0		0	0.00485437	0	0	0	0		0	0	0	0	0		0	0	0	0	0		0.00531915	0	0	0
GAC	0.0885417	0.122951	0.116162	0.185841	0.111111	0.135294	0.134259		0	0	0	0	0	0		0	0	0.00490196	0	0		0	0	0	0	0.00934579		0.0106383	0.0078125	0.00588235	0.0384615
GGC	0.046875	0.106557	0.0505051	0.0353982	0.106061	0.0352941	0.0231481		0.182796	0.194175	0.190476	0.225962	0.181818	0.17		0.238372	0.160194	0.22549	0.15625	0.151961		0.191919	0.181818	0.230769	0.200935	0.168224		0.212766	0.140625	0.305882	0.158654
mh05zha004	ACB	ASW	ESN	GWD	LWK	MSL	YRI		CDX	CHB	CHS	JPT	KHV	50 unrelated Han Chinese		BEB	GIH	ITU	PJL	STU		CEU	FIN	GBR	IBS	TSI		CLM	MXL	PEL	PUR
AGA	0.171875	0.204918	0.0858586	0.10177	0.0959596	0.141176	0.0833333		0.215054	0.320388	0.242857	0.322115	0.186869	0.37		0.197674	0.228155	0.20098	0.239583	0.0980392		0.520202	0.444444	0.543956	0.518692	0.476636		0.446809	0.445312	0.341176	0.461538
AGC	0.0677083	0.0409836	0.121212	0.0442478	0.0454545	0.0764706	0.0324074		0.00537634	0.00485437	0.0047619	0	0.0252525	0.01		0.00581395	0	0.00980392	0.00520833	0.00490196		0.00505051	0.146465	0.153846	0.0046729	0.0046729		0.0106383	0	0.00588235	0.206731
AGG	0.244792	0.311475	0.262626	0.336283	0.378788	0.205882	0.314815		0.284946	0.305825	0.328571	0.341346	0.419192	0.36		0.296512	0.359223	0.294118	0.276042	0.343137		0.176768	0	0	0.191589	0.233645		0.255319	0.25	0.358824	0
ATA	0	0	0	0	0	0	0		0	0	0	0	0	0		0.00581395	0	0	0	0		0	0	0	0	0		0	0	0	0
ATC	0.484375	0.409836	0.525253	0.517699	0.474747	0.558824	0.555556		0.413978	0.257282	0.309524	0.230769	0.277778	0.19		0.447674	0.349515	0.416667	0.395833	0.514706		0.151515	0.146465	0.175824	0.14486	0.135514		0.202128	0.179688	0.2	0.211538
ATG	0.0104167	0	0.00505051	0	0	0.0176471	0.0138889		0.00537634	0	0.0047619	0	0	0		0	0	0	0	0		0	0	0	0	0		0.00531915	0.0078125	0	0
GGA	0	0	0	0	0	0	0		0.00537634	0	0	0.00480769	0	0		0	0.00485437	0	0	0		0	0	0	0	0		0	0	0	0
GGC	0.0208333	0.0327869	0	0	0.00505051	0	0		0.0698925	0.11165	0.109524	0.100962	0.0909091	0.07		0.0465116	0.0582524	0.0784314	0.0833333	0.0392157		0.146465	0.227273	0.120879	0.130841	0.140187		0.0797872	0.117188	0.0941176	0.115385
GGG	0	0	0	0	0	0	0		0	0	0	0	0	0		0	0	0	0	0		0	0.0353535	0.00549451	0.00934579	0.00934579		0	0	0	0.00480769
mh07zha003	ACB	ASW	ESN	GWD	LWK	MSL	YRI		CDX	CHB	CHS	JPT	KHV	50 unrelated Han Chinese		BEB	GIH	ITU	PJL	STU		CEU	FIN	GBR	IBS	TSI		CLM	MXL	PEL	PUR
CGAC	0	0	0	0	0	0	0		0	0	0	0.00480769	0	0		0	0	0	0	0		0.00505051	0	0	0	0		0	0	0	0
CGAT	0.0104167	0.0245902	0	0.00884956	0	0	0		0.129032	0.257282	0.219048	0.341346	0.186869	0.35		0.0930233	0.0825243	0.117647	0.140625	0.166667		0.136364	0.191919	0.148352	0.107477	0.130841		0.106383	0.109375	0.0941176	0.110577
CGCC	0.28125	0.221311	0.217172	0.221239	0.252525	0.211765	0.259259		0.27957	0.174757	0.157143	0.120192	0.257576	0.14		0.104651	0.0873786	0.0784314	0.0677083	0.0980392		0	0.020202	0.00549451	0.0046729	0.00934579		0.00531915	0.0078125	0.0117647	0.0528846
CGCT	0.140625	0.188525	0.121212	0.176991	0.0909091	0.158824	0.125		0.225806	0.213592	0.271429	0.264423	0.242424	0.19		0.313953	0.291262	0.328431	0.270833	0.357843		0.292929	0.237374	0.21978	0.28972	0.228972		0.255319	0.210938	0.158824	0.216346
CGTT	0	0	0	0	0	0	0		0	0	0	0.00480769	0	0		0	0	0	0	0		0	0	0	0	0		0	0	0	0
CTAC	0	0	0	0	0	0	0		0	0	0	0	0	0		0	0	0	0	0		0	0	0	0	0		0.00531915	0	0	0
CTCC	0.015625	0.00819672	0.0151515	0.0265487	0.020202	0.0117647	0.00925926		0	0	0	0	0	0		0.465116	0	0	0	0		0	0	0.00549451	0.0046729	0.0046729		0.00531915	0	0	0.00480769
CTTC	0.536458	0.540984	0.626263	0.544248	0.590909	0.594118	0.587963		0.0967742	0.126214	0.109524	0.0769231	0.0656566	0.08		0	0.533981	0.460784	0.510417	0.367647		0.565657	0.530303	0.620879	0.593458	0.621495		0.526596	0.53125	0.494118	0.586538
TGAT	0	0	0	0	0	0	0		0	0	0	0	0	0		0	0	0	0	0		0	0	0	0	0.0046729		0	0	0	0
TGCC	0	0	0	0	0	0	0		0	0	0	0	0	0		0	0	0	0.0104167	0		0	0	0	0	0		0	0	0	0
TTTC	0.015625	0.0163934	0.020202	0.0221239	0.0454545	0.0235294	0.0185185		0.268817	0.228155	0.242857	0.1875	0.247475	0.24		0.0232558	0.00485437	0.0147059	0	0.00980392		0	0.020202	0	0	0		0.0957447	0.140625	0.241176	0.0288462
mh07zha004	ACB	ASW	ESN	GWD	LWK	MSL	YRI		CDX	CHB	CHS	JPT	KHV	50 unrelated Han Chinese		BEB	GIH	ITU	PJL	STU		CEU	FIN	GBR	IBS	TSI		CLM	MXL	PEL	PUR
ACC	0.166667	0.163934	0.116162	0.185841	0.131313	0.182353	0.162037		0.134409	0.199029	0.185714	0.177885	0.19697	0.2		0.145349	0.174757	0.220588	0.182292	0.230392		0.20202	0.166667	0.197802	0.233645	0.17757		0.191489	0.21875	0.3	0.259615
ACT	0	0	0.00505051	0	0	0	0		0	0	0	0	0	0		0	0	0	0	0		0.00505051	0	0.0164835	0	0		0	0	0	0.00480769
ATT	0	0	0	0	0	0	0		0	0	0	0	0	0		0	0	0	0	0		0	0	0.00549451	0	0		0.0159574	0	0	0
GCC	0.114583	0.237705	0.136364	0.115044	0.141414	0.147059	0.138889		0.182796	0.15534	0.138095	0.134615	0.156566	0.2		0.0465116	0.0291262	0.0490196	0.0833333	0.0294118		0.136364	0.10101	0.142857	0.116822	0.116822		0.143617	0.21875	0.194118	0.125
GCT	0	0	0.00505051	0.00442478	0	0	0		0.0107527	0	0.0047619	0	0.0151515	0		0	0	0	0.00520833	0.00490196		0.00505051	0.0151515	0	0.0140187	0.0140187		0	0	0	0.00961538
GTC	0	0	0.010101	0	0	0	0		0	0	0	0	0	0		0	0	0	0	0		0	0	0	0	0		0	0	0	0
GTT	0.0104167	0	0	0	0.00505051	0.00588235	0.0138889		0	0	0	0.00480769	0	0		0	0	0	0	0		0	0	0	0.00934579	0		0	0.015625	0	0
TCC	0.046875	0.0327869	0.040404	0.0707965	0.0353535	0.0764706	0.0416667		0.0430108	0.0242718	0	0.0240385	0.010101	0.02		0	0.00485437	0	0.00520833	0.00490196		0.00505051	0.010101	0.0274725	0.00934579	0.00934579		0.0159574	0	0.00588235	0.0144231
TCT	0.270833	0.303279	0.348485	0.265487	0.252525	0.2	0.287037		0.387097	0.383495	0.361905	0.399038	0.454545	0.33		0.668605	0.621359	0.534314	0.598958	0.563725		0.5	0.505051	0.395604	0.476636	0.523364		0.452128	0.382812	0.270588	0.451923
TTC	0.0104167	0	0	0	0	0	0.0185185		0	0	0	0	0	0		0	0	0	0	0		0	0	0	0	0		0	0	0	0
TTT	0.380208	0.262295	0.338384	0.358407	0.434343	0.388235	0.337963		0.241935	0.237864	0.309524	0.259615	0.166667	0.25		0.139535	0.169903	0.196078	0.125	0.166667		0.146465	0.20202	0.214286	0.140187	0.158879		0.180851	0.164062	0.229412	0.134615
mh07zha009	ACB	ASW	ESN	GWD	LWK	MSL	YRI		CDX	CHB	CHS	JPT	KHV	50 unrelated Han Chinese		BEB	GIH	ITU	PJL	STU		CEU	FIN	GBR	IBS	TSI		CLM	MXL	PEL	PUR
CAAT	0	0	0.010101	0.00442478	0.010101	0	0.0185185		0.0107527	0.00970874	0.0142857	0.0144231	0.00505051	0		0.0406977	0.0145631	0.0196078	0.00520833	0.0147059		0.010101	0.010101	0.021978	0.0140187	0.0186916		0.0478723	0.03125	0.0117647	0.00480769
CACC	0.161458	0.196721	0.176768	0.146018	0.131313	0.117647	0.148148		0.139785	0.150485	0.133333	0.149038	0.111111	0.2		0.25	0.354369	0.318627	0.260417	0.29902		0.484848	0.424242	0.521978	0.504673	0.471963		0.452128	0.179688	0.176471	0.379808
CACG	0.00520833	0	0	0	0.00505051	0	0		0.102151	0.165049	0.161905	0.149038	0.0858586	0.11		0.0581395	0.038835	0.0490196	0.0416667	0.102941		0.010101	0.020202	0.032967	0.0280374	0.0140187		0.0478723	0.03125	0.0588235	0
CACT	0.00520833	0	0	0	0	0	0.00462963		0	0.00485437	0.0047619	0.00961538	0.00505051	0.01		0	0.00485437	0.00980392	0.00520833	0.0147059		0.010101	0.00505051	0.00549451	0	0		0	0	0	0.00480769
CGAC	0.0104167	0	0	0	0.00505051	0.0176471	0.00462963		0	0	0	0	0	0		0.00581395	0	0	0	0		0	0	0	0	0		0	0	0	0
CGAT	0.453125	0.418033	0.419192	0.376106	0.479798	0.417647	0.444444		0.139785	0.0631068	0.0857143	0.0625	0.10101	0.07		0.0116279	0	0	0.0260417	0.00490196		0.00505051	0.010101	0	0.00934579	0.0046729		0.037234	0.0390625	0.0117647	0.0576923
CGCC	0.0104167	0	0	0	0	0	0		0	0	0	0.00480769	0	0		0.0116279	0	0.00490196	0	0.00490196		0	0	0	0	0.0046729		0	0	0	0.00480769
CGCT	0.015625	0.0491803	0.00505051	0.0221239	0.040404	0.00588235	0.0185185		0.177419	0.135922	0.190476	0.197115	0.186869	0.11		0.290698	0.252427	0.313725	0.229167	0.279412		0.20202	0.20202	0.181319	0.14486	0.228972		0.0957447	0.15625	0.0705882	0.182692
TAAT	0	0.0163934	0	0	0	0	0		0	0.00485437	0	0	0	0		0	0	0	0.00520833	0		0	0	0	0	0.0046729		0	0.0078125	0	0.00480769
TACC	0	0	0	0	0	0.00588235	0		0	0	0	0	0	0		0	0	0	0	0		0	0	0	0	0		0	0	0	0
TGAC	0	0	0.00505051	0	0.00505051	0	0.00925926		0	0	0	0.00480769	0	0		0.00581395	0.00970874	0.00490196	0.00520833	0.00980392		0	0	0.00549451	0	0		0.00531915	0.0078125	0.00588235	0
TGAT	0.338542	0.319672	0.383838	0.451327	0.323232	0.435294	0.351852		0.430108	0.466019	0.409524	0.408654	0.505051	0.5		0.325581	0.325243	0.279412	0.421875	0.269608		0.277778	0.328283	0.230769	0.299065	0.252336		0.308511	0.546875	0.664706	0.360577
TGCT	0	0	0	0	0	0	0		0	0	0	0	0	0		0	0	0	0	0		0	0	0	0	0		0.00531915	0	0	0
mh08zha011	ACB	ASW	ESN	GWD	LWK	MSL	YRI		CDX	CHB	CHS	JPT	KHV	50 unrelated Han Chinese		BEB	GIH	ITU	PJL	STU		CEU	FIN	GBR	IBS	TSI		CLM	MXL	PEL	PUR
CGAC	0	0	0	0	0	0	0		0	0	0	0	0	0		0	0	0	0.00520833	0		0	0	0	0	0		0	0	0	0
CGGC	0.046875	0.0901639	0	0	0	0	0		0.11828	0.131068	0.138095	0.0961538	0.0858586	0.12		0.162791	0.247573	0.215686	0.25	0.161765		0.318182	0.388889	0.302198	0.242991	0.275701		0.329787	0.210938	0.282353	0.158654
GGAC	0.53125	0.5	0.560606	0.553097	0.575758	0.523529	0.574074		0.408602	0.378641	0.342857	0.427885	0.348485	0.34		0.523256	0.470874	0.45098	0.322917	0.465686		0.348485	0.393939	0.401099	0.439252	0.38785		0.382979	0.429688	0.335294	0.548077
GGAT	0.0416667	0.0327869	0.0555556	0.0442478	0.0555556	0.0411765	0.0416667		0.150538	0.179612	0.152381	0.115385	0.161616	0.14		0.0581395	0.0436893	0.0539216	0.0625	0.0539216		0.040404	0.030303	0.0274725	0.0607477	0.0327103		0.0159574	0.0390625	0	0.0480769
GGGC	0	0	0	0	0	0	0		0	0	0	0.00480769	0.00505051	0		0	0	0	0	0		0.00505051	0	0	0	0.0046729		0	0	0	0
GGTC	0	0	0	0	0	0	0		0	0	0.0047619	0	0	0		0	0	0	0	0		0	0	0	0	0		0	0	0	0
GTAT	0.21875	0.229508	0.207071	0.128319	0.207071	0.188235	0.171296		0.129032	0.160194	0.147619	0.211538	0.227273	0.12		0.156977	0.145631	0.20098	0.260417	0.235294		0.217172	0.0656566	0.203297	0.196262	0.233645		0.180851	0.210938	0.247059	0.153846
GTGT	0	0	0	0	0	0	0		0	0	0	0	0	0		0	0	0	0	0		0	0	0.00549451	0	0		0	0	0	0
GTTC	0	0	0	0	0	0	0		0	0	0	0	0	0.01		0	0	0	0	0		0	0	0	0	0		0	0	0	0
GTTT	0.161458	0.147541	0.176768	0.274336	0.161616	0.247059	0.212963		0.193548	0.150485	0.214286	0.144231	0.171717	0.27		0.0988372	0.092233	0.0784314	0.0989583	0.0833333		0.0707071	0.121212	0.0604396	0.0607477	0.0654206		0.0904255	0.109375	0.135294	0.0913462
mh09zha008	ACB	ASW	ESN	GWD	LWK	MSL	YRI		CDX	CHB	CHS	JPT	KHV	50 unrelated Han Chinese		BEB	GIH	ITU	PJL	STU		CEU	FIN	GBR	IBS	TSI		CLM	MXL	PEL	PUR
AAA	0.03125	0.0655738	0.0151515	0.0221239	0.040404	0	0.0981308		0.198925	0.174757	0.12381	0.134615	0.257576	0.17		0.116279	0.101942	0.0882353	0.09375	0.0833333		0.10101	0.0555556	0.115385	0.121495	0.0981308		0.138298	0.0546875	0	0.120192
AGA	0.270833	0.286885	0.242424	0.265487	0.272727	0.2	0.196262		0.392473	0.466019	0.461905	0.456731	0.393939	0.39		0.244186	0.174757	0.313725	0.255208	0.338235		0.121212	0.146465	0.0989011	0.135514	0.196262		0.25	0.375	0.482353	0.182692
CAC	0	0	0	0	0	0.00588235	0		0	0	0	0	0	0		0	0	0	0	0		0	0	0	0	0		0	0	0	0
CGA	0.171875	0.196721	0.207071	0.163717	0.181818	0.147059	0.182243		0.0967742	0.0873786	0.0761905	0.120192	0.0858586	0.06		0.215116	0.34466	0.313725	0.208333	0.269608		0.252525	0.242424	0.258242	0.205607	0.182243		0.164894	0.171875	0.0588235	0.139423
CGC	0.244792	0.270492	0.348485	0.247788	0.29798	0.276471	0.135514		0.172043	0.116505	0.114286	0.139423	0.126263	0.14		0.122093	0.101942	0.0735294	0.135417	0.0833333		0.20202	0.252525	0.153846	0.182243	0.135514		0.18617	0.179688	0.188235	0.206731
TAC	0	0	0	0	0	0	0		0	0	0	0	0	0		0	0	0	0	0		0	0	0	0	0		0	0	0.0117647	0
TGC	0.28125	0.180328	0.186869	0.300885	0.207071	0.370588	0.38785		0.139785	0.15534	0.22381	0.149038	0.136364	0.24		0.302326	0.276699	0.210784	0.307292	0.22549		0.323232	0.30303	0.373626	0.35514	0.38785		0.260638	0.21875	0.258824	0.350962
mh10zha002	ACB	ASW	ESN	GWD	LWK	MSL	YRI		CDX	CHB	CHS	JPT	KHV	50 unrelated Han Chinese		BEB	GIH	ITU	PJL	STU		CEU	FIN	GBR	IBS	TSI		CLM	MXL	PEL	PUR
AACG	0.0572917	0.0901639	0.0707071	0.0752212	0.020202	0.0470588	0.037037		0.16129	0.140777	0.157143	0.173077	0.181818	0.24		0.226744	0.262136	0.259804	0.203125	0.215686		0.313131	0.247475	0.263736	0.247664	0.17757		0.191489	0.234375	0.205882	0.221154
GACA	0.489583	0.352459	0.464646	0.597345	0.40404	0.582353	0.467593		0.182796	0.208738	0.290476	0.173077	0.191919	0.28		0.151163	0.18932	0.122549	0.208333	0.181373		0.277778	0.267677	0.241758	0.303738	0.261682		0.340426	0.328125	0.423529	0.336538
GACG	0.0885417	0.0901639	0.0555556	0.0265487	0.141414	0.0823529	0.0925926		0.241935	0.276699	0.180952	0.182692	0.207071	0.19		0.244186	0.247573	0.289216	0.171875	0.254902		0.181818	0.186869	0.236264	0.205607	0.238318		0.154255	0.0703125	0.123529	0.201923
GACT	0	0	0.00505051	0.00442478	0	0	0.00462963		0	0	0	0	0	0		0	0	0	0	0		0	0	0	0	0		0	0	0	0
GAGA	0.078125	0.114754	0.0656566	0.0619469	0.0808081	0.0647059	0.0231481		0.00537634	0.00485437	0.00952381	0.0673077	0	0		0.0290698	0.0242718	0.0196078	0.046875	0.0245098		0.0656566	0.00505051	0.0494505	0.102804	0.116822		0.0691489	0.046875	0.0235294	0.0576923
GAGG	0	0	0	0	0	0	0.0231481		0	0.00485437	0	0	0	0		0	0	0	0	0		0	0.0353535	0	0	0		0	0	0	0
GAGT	0.286458	0.352459	0.338384	0.234513	0.353535	0.223529	0.351852		0.408602	0.359223	0.357143	0.403846	0.419192	0.29		0.348837	0.276699	0.308824	0.369792	0.323529		0.161616	0.257576	0.208791	0.140187	0.205607		0.244681	0.320312	0.223529	0.182692
GCGG	0	0	0	0	0	0	0		0	0.00485437	0.0047619	0	0	0		0	0	0	0	0		0	0	0	0	0		0	0	0	0
mh11zha006a	ACB	ASW	ESN	GWD	LWK	MSL	YRI		CDX	CHB	CHS	JPT	KHV	50 unrelated Han Chinese		BEB	GIH	ITU	PJL	STU		CEU	FIN	GBR	IBS	TSI		CLM	MXL	PEL	PUR
AATT	0.328125	0.270492	0.262626	0.340708	0.343434	0.264706	0.296296		0.236559	0.228155	0.142857	0.173077	0.131313	0.17		0.186047	0.257282	0.235294	0.236842	0.196078		0.126263	0.161616	0.159341	0.149533	0.140187		0.101064	0.171875	0.1	0.177885
AGCC	0.0520833	0.0819672	0.0151515	0.0353982	0.040404	0.0176471	0.0277778		0.155914	0.145631	0.166667	0.163462	0.191919	0.17		0.25	0.237864	0.181373	0.242105	0.220588		0.287879	0.338384	0.379121	0.369159	0.266355		0.170213	0.148438	0.1	0.245192
AGCT	0.526042	0.52459	0.580808	0.530973	0.505051	0.670588	0.560185		0.0698925	0.0873786	0.0714286	0.0865385	0.0707071	0.05		0.168605	0.15534	0.196078	0.2	0.171569		0.434343	0.373737	0.346154	0.327103	0.439252		0.457447	0.445312	0.488235	0.418269
AGTT	0	0	0	0	0	0	0		0	0	0	0	0	0		0.0116279	0	0.00980392	0.00526316	0.0196078		0	0	0	0	0.0046729		0	0.0078125	0	0
ATCC	0.0625	0.0491803	0.0656566	0.0132743	0.030303	0.0176471	0.0509259		0.435484	0.368932	0.461905	0.326923	0.479798	0.39		0.313953	0.262136	0.313725	0.242105	0.27451		0.0909091	0.0808081	0.0879121	0.0654206	0.0981308		0.212766	0.179688	0.294118	0.0961538
ATCT	0	0	0	0	0	0	0		0	0	0	0	0	0		0	0	0	0	0		0	0	0	0	0		0	0	0	0.00480769
GGCC	0.03125	0.0737705	0.0757576	0.079646	0.0808081	0.0294118	0.0648148		0.102151	0.169903	0.157143	0.245192	0.126263	0.22		0.0697674	0.0873786	0.0637255	0.0736842	0.117647		0.0606061	0.0454545	0.0274725	0.088785	0.0514019		0.0585106	0.046875	0.0176471	0.0576923
GTCC	0	0	0	0	0	0	0		0	0	0	0.00480769	0	0		0	0	0	0	0		0	0	0	0	0		0	0	0	0
mh14zha003	ACB	ASW	ESN	GWD	LWK	MSL	YRI		CDX	CHB	CHS	JPT	KHV	50 unrelated Han Chinese		BEB	GIH	ITU	PJL	STU		CEU	FIN	GBR	IBS	TSI		CLM	MXL	PEL	PUR
CAT	0.0885417	0.114754	0.0909091	0.176991	0.151515	0.105882	0.0833333		0.0537634	0.126214	0.0913462	0.0576923	0.0505051	0.13		0.0639535	0.11165	0.0784314	0.0677083	0.0392157		0.0454545	0.0454545	0.032967	0.0373832	0.0981308		0.0265957	0.015625	0.0411765	0.0432692
CCA	0.244792	0.196721	0.151515	0.123894	0.242424	0.258824	0.185185		0.354839	0.407767	0.403846	0.283654	0.353535	0.42		0.267442	0.242718	0.196078	0.203125	0.196078		0.40404	0.429293	0.406593	0.341121	0.303738		0.351064	0.398438	0.423529	0.403846
CCG	0	0	0	0	0	0.00588235	0.00462963		0	0	0	0	0	0		0	0	0	0	0		0	0.00505051	0	0	0		0	0	0	0
CCT	0.494792	0.418033	0.515152	0.553097	0.424242	0.435294	0.50463		0.0698925	0.0631068	0.0673077	0.0480769	0.0707071	0.07		0.145349	0.15534	0.186275	0.161458	0.166667		0.161616	0.131313	0.208791	0.21028	0.200935		0.218085	0.109375	0.0764706	0.168269
GCA	0.0729167	0.0819672	0.141414	0.039823	0.0909091	0.0882353	0.143519		0.198925	0.160194	0.139423	0.259615	0.19697	0.16		0.0406977	0.00485437	0.0343137	0.0416667	0.0294118		0.0252525	0.030303	0.010989	0.0233645	0.0186916		0.101064	0.132812	0.188235	0.0576923
GCG	0.0989583	0.172131	0.10101	0.106195	0.0909091	0.105882	0.0787037		0.322581	0.242718	0.298077	0.350962	0.328283	0.22		0.482558	0.480583	0.504902	0.526042	0.568627		0.363636	0.358586	0.340659	0.38785	0.378505		0.303191	0.34375	0.270588	0.326923
GCT	0	0.0163934	0	0	0	0	0		0	0	0	0	0	0		0	0.00485437	0	0	0		0	0	0	0	0		0	0	0	0
mh16zha009	ACB	ASW	ESN	GWD	LWK	MSL	YRI		CDX	CHB	CHS	JPT	KHV	50 unrelated Han Chinese		BEB	GIH	ITU	PJL	STU		CEU	FIN	GBR	IBS	TSI		CLM	MXL	PEL	PUR
GCCC	0.723958	0.770492	0.752525	0.69469	0.656566	0.747059	0.699074		0.274194	0.349515	0.304762	0.293269	0.333333	0.36		0.476744	0.529126	0.519608	0.505208	0.598039		0.616162	0.646465	0.648352	0.61215	0.593458		0.494681	0.570312	0.358824	0.557692
GCCT	0	0	0	0.0221239	0	0	0		0.0967742	0.150485	0.157143	0.110577	0.141414	0.12		0.127907	0.101942	0.122549	0.09375	0.137255		0	0.010101	0	0	0		0.0106383	0	0.00588235	0
GCTC	0	0	0	0	0	0	0		0	0	0	0.00961538	0	0		0	0	0	0	0		0	0	0	0.0046729	0		0	0	0.00588235	0
GGCC	0.00520833	0	0.00505051	0	0.00505051	0.0176471	0.00462963		0	0	0	0	0	0		0	0	0	0.00520833	0		0	0	0	0	0		0	0	0	0.00480769
GGTC	0.0572917	0.0737705	0.010101	0.0442478	0.0555556	0.0529412	0.0601852		0.284946	0.296117	0.352381	0.379808	0.222222	0.31		0.19186	0.169903	0.156863	0.213542	0.122549		0.156566	0.191919	0.192308	0.168224	0.200935		0.143617	0.15625	0.217647	0.163462
GTCC	0.182292	0.139344	0.217172	0.212389	0.247475	0.176471	0.203704		0.0215054	0	0.0047619	0	0.0252525	0		0.0465116	0.0728155	0.0343137	0.03125	0.00980392		0.141414	0.10101	0.115385	0.135514	0.14486		0.148936	0.0625	0.0176471	0.110577
GTCT	0.00520833	0	0	0	0	0	0		0	0	0	0	0	0		0	0	0	0	0		0	0	0	0	0.0046729		0	0	0	0
GTTC	0	0	0	0	0	0	0		0	0	0	0	0	0		0	0	0	0	0		0	0.00505051	0	0	0		0	0	0	0
TCCC	0	0	0	0	0	0	0		0	0	0	0	0	0		0	0	0	0	0		0	0	0	0	0.0046729		0	0	0	0
TGTC	0	0	0	0	0	0.00588235	0		0	0	0	0	0	0		0	0	0	0	0		0	0	0	0	0		0	0	0	0
TTCC	0.0260417	0.0163934	0.0151515	0.0265487	0.0353535	0	0.0324074		0.322581	0.199029	0.180952	0.206731	0.277778	0.21		0.156977	0.126214	0.166667	0.151042	0.132353		0.0858586	0.0454545	0.043956	0.0794393	0.0514019		0.202128	0.210938	0.394118	0.163462
TTTC	0	0	0	0	0	0	0		0	0.00485437	0	0	0	0		0	0	0	0	0		0	0	0	0	0		0	0	0	0
mh17zha001	ACB	ASW	ESN	GWD	LWK	MSL	YRI		CDX	CHB	CHS	JPT	KHV	50 unrelated Han Chinese		BEB	GIH	ITU	PJL	STU		CEU	FIN	GBR	IBS	TSI		CLM	MXL	PEL	PUR
AAA	0	0	0	0	0	0	0		0.0107527	0	0	0	0	0		0	0.00970874	0	0	0		0	0.00505051	0	0	0		0	0	0	0
AAG	0.291667	0.188525	0.333333	0.314159	0.333333	0.288235	0.268519		0.16129	0.286408	0.266667	0.283654	0.20202	0.31		0.162791	0.135922	0.181373	0.130208	0.142157		0.0555556	0.0858586	0.120879	0.0700935	0.088785		0.143617	0.234375	0.217647	0.129808
AGA	0.380208	0.47541	0.348485	0.389381	0.338384	0.347059	0.356481		0.413978	0.247573	0.338095	0.25	0.40404	0.3		0.52907	0.5	0.52451	0.572917	0.598039		0.545455	0.570707	0.554945	0.528037	0.53271		0.510638	0.484375	0.476471	0.480769
AGG	0.03125	0.00819672	0.00505051	0	0.0151515	0.0176471	0.0138889		0.0107527	0	0.0047619	0.00961538	0.040404	0		0.0116279	0.0242718	0.0147059	0.0260417	0.00980392		0.0606061	0.0656566	0.0604396	0.0654206	0.0607477		0.0531915	0.046875	0.00588235	0.0288462
ATA	0.00520833	0	0	0	0.00505051	0	0.0185185		0.016129	0.00970874	0.00952381	0	0.00505051	0		0	0	0.00490196	0.00520833	0		0	0.010101	0	0.0046729	0		0	0.0078125	0	0.00480769
ATG	0.28125	0.295082	0.308081	0.292035	0.308081	0.347059	0.342593		0.247312	0.262136	0.261905	0.3125	0.20202	0.21		0.180233	0.18932	0.151961	0.151042	0.147059		0.0757576	0.0454545	0.0714286	0.116822	0.102804		0.159574	0.132812	0.205882	0.245192
GAG	0.0104167	0	0	0	0	0	0		0	0	0	0	0	0		0	0	0	0	0		0	0	0	0	0		0	0	0	0
GGA	0	0.0327869	0	0.00442478	0	0	0		0.139785	0.194175	0.119048	0.139423	0.146465	0.18		0.116279	0.140777	0.122549	0.114583	0.102941		0.262626	0.207071	0.186813	0.214953	0.21028		0.132979	0.09375	0.0882353	0.110577
GGG	0	0	0	0	0	0	0		0	0	0	0	0	0		0	0	0	0	0		0	0	0	0	0.0046729		0	0	0.00588235	0
GTA	0	0	0	0	0	0	0		0	0	0	0.00480769	0	0		0	0	0	0	0		0	0	0.00549451	0	0		0	0	0	0
GTG	0	0	0.00505051	0	0	0	0		0	0	0	0	0	0		0	0	0	0	0		0	0.010101	0	0	0		0	0	0	0
mh19zha007	ACB	ASW	ESN	GWD	LWK	MSL	YRI		CDX	CHB	CHS	JPT	KHV	50 unrelated Han Chinese		BEB	GIH	ITU	PJL	STU		CEU	FIN	GBR	IBS	TSI		CLM	MXL	PEL	PUR
AAAG	0	0	0.00505051	0	0	0	0		0	0	0	0	0	0		0	0	0	0	0		0	0	0	0	0		0	0	0	0
AAGC	0	0	0	0	0	0	0		0	0	0	0	0	0.02		0	0	0	0	0		0	0	0	0	0.0046729		0	0	0	0
AAGG	0.0885417	0.122951	0.106061	0.0663717	0.0656566	0.0941176	0.134259		0.193548	0.218447	0.185714	0.221154	0.151515	0.21		0.0581395	0.00970874	0.00980392	0.0104167	0.0686275		0.00505051	0.0151515	0	0.0046729	0		0.12234	0.242188	0.288235	0.0865385
GAAG	0.333333	0.278689	0.363636	0.50885	0.393939	0.417647	0.393519		0.22043	0.194175	0.238095	0.144231	0.176768	0.16		0.0290698	0.0242718	0.0294118	0.03125	0.0882353		0.0353535	0.0959596	0.0714286	0.0514019	0.0560748		0.0957447	0.03125	0.0352941	0.0625
GAGC	0.255208	0.229508	0.217172	0.150442	0.136364	0.182353	0.157407		0.301075	0.247573	0.233333	0.235577	0.378788	0.26		0.174419	0.237864	0.186275	0.208333	0.215686		0.267677	0.328283	0.32967	0.313084	0.285047		0.25	0.265625	0.141176	0.317308
GAGG	0.208333	0.237705	0.217172	0.176991	0.191919	0.182353	0.185185		0.177419	0.218447	0.209524	0.326923	0.191919	0.2		0.511628	0.398058	0.372549	0.401042	0.367647		0.464646	0.388889	0.362637	0.401869	0.415888		0.361702	0.3125	0.482353	0.432692
GGGG	0	0.00819672	0	0	0	0	0		0	0	0	0	0	0		0	0.0339806	0.0245098	0.00520833	0.0245098		0.010101	0.00505051	0	0.0046729	0.0233645		0.0106383	0	0	0
TAGG	0	0	0	0	0.010101	0	0		0	0	0	0	0	0		0	0	0	0	0		0	0	0	0	0		0	0	0	0
TGGG	0.114583	0.122951	0.0909091	0.0973451	0.20202	0.123529	0.12963		0.107527	0.121359	0.133333	0.0721154	0.10101	0.15		0.226744	0.296117	0.377451	0.34375	0.235294		0.217172	0.166667	0.236264	0.224299	0.214953		0.159574	0.148438	0.0529412	0.100962
mh19zha009	ACB	ASW	ESN	GWD	LWK	MSL	YRI		CDX	CHB	CHS	JPT	KHV	50 unrelated Han Chinese		BEB	GIH	ITU	PJL	STU		CEU	FIN	GBR	IBS	TSI		CLM	MXL	PEL	PUR
CCAGA	0	0	0	0	0	0	0		0	0	0	0	0	0.01		0	0	0	0	0		0	0	0	0	0		0	0	0	0
CTAGG	0	0	0	0	0	0	0		0	0	0	0	0	0		0	0.00485437	0	0	0		0	0	0	0	0		0	0	0	0
CTATA	0	0	0	0	0	0	0		0	0	0	0	0	0		0	0	0	0	0		0	0	0	0	0		0	0	0.00588235	0
CTATG	0.0364583	0.057377	0.126263	0.0221239	0.0757576	0.0117647	0.0324074		0.198925	0.305825	0.247619	0.206731	0.247475	0.29		0.25	0.247573	0.235294	0.177083	0.235294		0.0909091	0.0606061	0.126374	0.088785	0.107477		0.0425532	0.0703125	0.0941176	0.100962
CTGTG	0	0	0	0	0	0	0		0	0	0	0	0	0		0	0	0	0.0104167	0		0	0	0	0	0		0	0	0	0
GCATA	0	0	0	0	0	0.00588235	0		0	0	0	0	0	0		0	0	0	0	0		0	0	0	0	0		0	0	0	0
GCCGA	0.25	0.352459	0.247475	0.331858	0.257576	0.258824	0.263889		0.27957	0.237864	0.32381	0.269231	0.287879	0.24		0.25	0.23301	0.254902	0.265625	0.284314		0.388889	0.282828	0.28022	0.32243	0.285047		0.255319	0.148438	0.0647059	0.283654
GCCGG	0.0104167	0	0.0151515	0	0	0.0235294	0.00462963		0	0	0	0.00480769	0.00505051	0		0	0.00485437	0.0147059	0.0104167	0.00490196		0.010101	0	0.010989	0	0		0.0159574	0	0	0
GCCTA	0.322917	0.254098	0.237374	0.278761	0.227273	0.347059	0.226852		0.102151	0.0970874	0.0714286	0.120192	0.136364	0.1		0.238372	0.271845	0.289216	0.364583	0.323529		0.308081	0.287879	0.296703	0.308411	0.299065		0.31383	0.328125	0.294118	0.341346
GCCTG	0	0.0245902	0.00505051	0.0265487	0.030303	0.00588235	0.0185185		0.00537634	0.00485437	0.0047619	0	0	0		0.00581395	0.00485437	0.00980392	0.0104167	0.0245098		0	0.020202	0.010989	0.0140187	0.0280374		0	0.015625	0	0.0144231
GTATA	0	0	0	0	0	0	0		0	0	0	0.00480769	0	0		0	0	0	0	0		0	0	0	0	0		0	0	0	0
GTATG	0.203125	0.147541	0.212121	0.141593	0.267677	0.170588	0.263889		0.00537634	0	0	0	0.010101	0.01		0.0348837	0.0582524	0.0490196	0.03125	0.0294118		0	0	0	0.0046729	0.0140187		0.0319149	0.0234375	0	0.00480769
GTCGA	0	0	0	0	0	0	0		0	0	0	0	0	0		0	0	0	0	0		0	0	0	0	0		0.00531915	0	0	0
GTCTA	0	0	0	0	0	0	0		0	0	0	0	0	0		0	0	0	0	0		0	0.00505051	0	0	0		0	0	0	0
GTGTA	0	0	0	0	0.00505051	0	0		0	0	0	0	0	0		0	0	0	0	0		0	0	0	0.0046729	0		0	0	0	0
GTGTG	0.177083	0.163934	0.156566	0.199115	0.136364	0.176471	0.189815		0.408602	0.354369	0.352381	0.394231	0.313131	0.34		0.22093	0.174757	0.147059	0.130208	0.0980392		0.20202	0.343434	0.274725	0.257009	0.266355		0.335106	0.414062	0.541176	0.254808
mh22zha008	ACB	ASW	ESN	GWD	LWK	MSL	YRI		CDX	CHB	CHS	JPT	KHV	50 unrelated Han Chinese		BEB	GIH	ITU	PJL	STU		CEU	FIN	GBR	IBS	TSI		CLM	MXL	PEL	PUR
CCT	0.432292	0.434426	0.550505	0.482301	0.510101	0.647059	0.657407		0.33871	0.325243	0.309524	0.350962	0.388889	0.38		0.302326	0.330097	0.289216	0.34375	0.29902		0.262626	0.227273	0.384615	0.317757	0.32243		0.18617	0.453125	0.364706	0.360577
CTC	0.0625	0.0655738	0.030303	0.0132743	0.0151515	0.0294118	0.0277778		0.430108	0.339806	0.371429	0.326923	0.378788	0.27		0.145349	0.0873786	0.166667	0.125	0.132353		0.10101	0.141414	0.0934066	0.126168	0.140187		0.0638298	0.171875	0.105882	0.115385
CTT	0.229167	0.114754	0.212121	0.168142	0.237374	0.135294	0.138889		0.0376344	0.0339806	0.0238095	0.0528846	0.0454545	0.05		0.139535	0.15534	0.210784	0.213542	0.191176		0.363636	0.39899	0.263736	0.252336	0.303738		0.382979	0.132812	0.217647	0.211538
TCT	0.239583	0.180328	0.19697	0.309735	0.10101	0.188235	0.115741		0.107527	0.223301	0.190476	0.139423	0.0858586	0.24		0.122093	0.0631068	0.0980392	0.125	0.117647		0.181818	0.131313	0.0714286	0.0700935	0.168224		0.25	0.078125	0.0882353	0.125
TTT	0.0364583	0.204918	0.010101	0.0265487	0.136364	0	0.0601852		0.0860215	0.0776699	0.104762	0.129808	0.10101	0.06		0.290698	0.364078	0.235294	0.192708	0.259804		0.0909091	0.10101	0.186813	0.233645	0.0654206		0.117021	0.164062	0.223529	0.1875
